# Supplementary material for: Peripheral blood immune cell parameters in patients with high-grade squamous intraepithelial lesion (HSIL) and cervical cancer and their clinical value: a retrospective study
Source: PeerJ. 2024 Jun 3;12:e17499. doi: 10.7717/peerj.17499 (PMC11155673; doi:10.7717/peerj.17499)
Supplement: Data S1 [file peerj-12-17499-s001.xlsx]

## Sheet: Cervical cancer group
number	age	menopause	Number of pregnancies	Number of parturition	hypertension	diabetes	PLR	NLR	Pathological type	clinical stages	Tumor diameter	Degree of muscle wall infiltration	Vascular invasion	perineural invasion
1	54	no	4	3	no	no	167.71	3.19	Squamous cell carcinoma	III Phase	<4cm	1/2-2/3	not	not
2	46	no	3	2	no	no	173.31	2.36	adenocarcinoma	II Phase	≥4cm	1/2-2/3	not	not
3	55	yes	3	2	no	no	211.79	2.93	Squamous cell carcinoma	III Phase	≥4cm	2/3-full-thickness	not	not
4	54	no	2	2	no	no	200	3.34	Squamous cell carcinoma	II Phase	≥4cm	2/3-full-thickness	not	not
5	61	yes	3	2	no	no	176.2	2.99	Squamous cell carcinoma	II Phase	<4cm	2/3-full-thickness	have	have
6	60	yes	3	2	no	no	134.22	2.94	Squamous cell carcinoma	II Phase	<4cm	2/3-full-thickness	not	have
7	57	yes	4	3	no	no	225.87	2.85	Squamous cell carcinoma	I Phase	<4cm	1/2-2/3	not	not
8	49	no	4	3	yes	no	133.85	3.13	Squamous cell carcinoma	II Phase	≥4cm	2/3-full-thickness	not	not
9	49	no	4	3	no	no	203.39	3.27	adenocarcinoma	I Phase	≥4cm	2/3-full-thickness	not	not
10	39	no	3	2	no	yes	175.42	2.29	Squamous cell carcinoma	II Phase	<4cm	1/2-2/3	not	not
11	49	no	3	2	no	no	149.42	3.21	Squamous cell carcinoma	III Phase	<4cm	<1/2	have	not
12	42	no	4	3	no	no	153.71	2.07	Squamous cell carcinoma	III Phase	<4cm	1/2-2/3	not	not
13	58	yes	4	3	no	no	175.11	2.62	Squamous cell carcinoma	III Phase	≥4cm	1/2-2/3	have	not
14	58	yes	3	2	no	no	173.4	2.66	Squamous cell carcinoma	I Phase	<4cm	<1/2	not	not
15	53	no	2	2	no	no	180.38	2.71	Squamous cell carcinoma	III Phase	<4cm	1/2-2/3	not	not
16	50	no	3	2	yes	no	214.76	3.28	Squamous cell carcinoma	III Phase	<4cm	2/3-full-thickness	not	have
17	53	no	2	2	no	no	188.25	3.07	Squamous cell carcinoma	II Phase	<4cm	1/2-2/3	not	not
18	63	yes	4	3	no	no	185.12	2.59	Squamous cell carcinoma	II Phase	≥4cm	2/3-full-thickness	have	have
19	61	yes	3	2	no	no	177.58	3.21	adenocarcinoma	II Phase	≥4cm	1/2-2/3	not	not
20	49	no	3	2	yes	no	181.61	2.37	Squamous cell carcinoma	I Phase	<4cm	1/2-2/3	have	have
21	53	no	3	2	yes	no	148.91	2.41	Squamous cell carcinoma	III Phase	≥4cm	2/3-full-thickness	have	not
22	45	no	4	3	no	no	138.64	3.21	Squamous cell carcinoma	II Phase	<4cm	2/3-full-thickness	have	not
23	60	yes	3	2	no	no	137.81	2.4	adenocarcinoma	I Phase	<4cm	1/2-2/3	not	not
24	57	yes	3	2	no	no	125.65	2.92	Squamous cell carcinoma	II Phase	<4cm	2/3-full-thickness	have	not
25	58	yes	4	3	no	no	161.1	3.33	adenocarcinoma	I Phase	≥4cm	2/3-full-thickness	have	not
26	42	no	3	2	no	no	175.37	2.96	adenocarcinoma	II Phase	≥4cm	2/3-full-thickness	not	not
27	56	yes	4	3	yes	no	156.45	2.42	Squamous cell carcinoma	I Phase	≥4cm	2/3-full-thickness	not	have
28	47	no	3	2	no	yes	223.05	3.32	Squamous cell carcinoma	II Phase	<4cm	<1/2	have	not
29	50	no	3	2	yes	no	189.46	2.42	Squamous cell carcinoma	I Phase	<4cm	2/3-full-thickness	not	not
30	57	yes	3	2	no	no	231.08	2.42	Squamous cell carcinoma	I Phase	≥4cm	1/2-2/3	have	not
31	54	yes	3	2	no	yes	197.12	2.95	Squamous cell carcinoma	II Phase	<4cm	1/2-2/3	have	not
32	51	no	3	2	yes	no	200.74	3.04	Squamous cell carcinoma	II Phase	<4cm	2/3-full-thickness	not	have
33	56	yes	3	2	yes	no	194.82	3.69	Squamous cell carcinoma	III Phase	<4cm	1/2-2/3	have	have
34	63	yes	3	3	no	no	172.13	2.46	Squamous cell carcinoma	I Phase	<4cm	1/2-2/3	not	not
35	48	no	3	2	no	no	114.7	3.35	Squamous cell carcinoma	II Phase	≥4cm	1/2-2/3	not	have
36	44	no	3	2	no	yes	243.74	3.61	Squamous cell carcinoma	II Phase	<4cm	1/2-2/3	have	not
37	45	no	4	3	no	no	105.93	3.47	adenocarcinoma	I Phase	<4cm	1/2-2/3	not	not
38	46	no	3	2	no	no	225.8	3.09	Squamous cell carcinoma	II Phase	<4cm	1/2-2/3	not	not
39	48	no	3	2	yes	no	158.4	3.88	adenocarcinoma	II Phase	<4cm	2/3-full-thickness	not	not
40	56	yes	5	3	no	no	186.38	2.91	Squamous cell carcinoma	I Phase	<4cm	1/2-2/3	not	not
41	39	no	3	2	no	no	228.62	3.24	Squamous cell carcinoma	II Phase	≥4cm	1/2-2/3	not	have
42	54	yes	4	3	no	no	224.16	3.42	Squamous cell carcinoma	II Phase	≥4cm	1/2-2/3	have	have
mean value	52.12		3.26	2.33			179.08	2.95
variance	6.37		0.63	0.48			33.54	0.43

## Sheet: HSIL group
number	age	menopause	Number of pregnancies	Number of parturition	hypertension	diabetes	PLR	NLR
1	57	yes	4	3	no	no	196.39	2.61
2	53	no	3	2	no	no	118.22	1.61
3	46	no	3	2	yes	no	171.63	3.45
4	52	no	3	2	no	no	203.01	1.45
5	53	yes	3	2	yes	no	121.74	1.23
6	59	yes	4	3	no	no	198.84	2.98
7	57	yes	3	2	yes	no	199.35	1.96
8	49	no	3	2	no	no	141.61	1.99
9	63	yes	3	2	no	no	118.65	2.61
10	52	no	4	3	no	no	190.13	2.34
11	46	no	3	2	no	no	203.97	2.56
12	49	no	2	2	no	no	195.51	2.96
13	58	yes	3	2	no	no	202.29	1.78
14	53	yes	2	2	no	no	130.54	1.74
15	58	yes	4	3	yes	no	195.69	1.02
16	52	no	3	2	no	no	152.75	2.42
17	69	yes	3	2	no	no	153.44	3.28
18	40	no	2	2	no	no	116.75	2.16
19	49	no	4	2	no	no	214.74	3.15
20	51	no	3	2	no	no	180.61	3.18
21	53	yes	2	2	no	no	211.17	3.55
22	62	yes	3	2	yes	yes	229.89	3.55
23	53	yes	3	2	no	no	132.2	2.18
24	51	no	3	2	no	no	197.87	2.04
25	52	no	3	2	no	no	173.68	2.78
26	57	yes	4	3	no	no	207.88	2.19
27	47	no	3	2	no	yes	215.01	3.93
28	55	yes	3	2	no	no	204.42	3.87
29	41	no	3	2	no	no	143.99	2.82
30	51	no	4	3	no	no	169.48	2.39
31	45	no	2	1	no	no	183.89	3.16
32	47	no	2	2	yes	no	290.67	2.2
33	54	yes	2	2	yes	no	219.4	2.64
34	44	no	2	2	no	no	259.76	2.31
35	45	no	2	2	no	no	189.44	2.83
36	41	no	4	3	no	no	181.96	3.67
37	36	no	3	2	no	yes	196.77	3.35
38	51	no	3	2	no	no	154.68	3.68
39	60	yes	4	3	yes	no	219.95	1.99
mean value	51.56		3	2.18			184.31	2.61
variance	6.76		0.69	0.45			38.72	0.74

## Sheet: Healthy control group
number	age	menopause	Number of pregnancies	Number of parturition	hypertension	diabetes	PLR	NLR
1	60	yes	2	2	no	no	163.67	1.08
2	53	no	2	2	yes	no	117.82	4.2
3	52	no	2	2	no	no	137.53	1.84
4	46	no	2	2	no	no	92.05	2.03
5	62	yes	3	2	yes	no	175.26	0.51
6	45	no	3	2	no	no	101.42	2.22
7	41	no	2	1	no	no	101.21	3.26
8	59	yes	3	2	no	no	154.34	2.46
9	56	yes	3	2	no	no	124.39	2.37
10	44	no	3	2	no	no	166.94	3.86
11	42	no	2	2	no	no	132.3	2.42
12	50	no	3	2	no	no	124.94	1.59
13	57	yes	2	2	no	no	139.02	1.37
14	37	no	3	2	yes	no	166.45	2.68
15	55	yes	3	2	no	no	140.24	2.9
16	55	yes	4	3	no	no	174.2	1.85
17	46	no	3	2	no	no	149.85	1.92
18	37	no	3	2	no	no	145.64	1.14
19	46	no	3	3	no	no	99.05	2.52
20	50	no	4	3	yes	yes	128.92	2.14
21	54	no	2	2	no	no	115.35	2.46
22	64	yes	3	2	no	no	114.28	3.59
23	60	yes	3	2	no	no	159.28	1.88
24	49	no	3	2	no	no	171.37	2.31
25	57	yes	3	3	yes	yes	104.81	2.36
26	46	no	3	2	no	no	147.49	0.83
27	57	yes	3	2	no	no	120.72	2.52
28	54	no	3	2	no	no	127.05	1.38
29	60	yes	3	3	no	no	148.76	1.36
30	48	no	3	3	no	no	152.34	1.4
31	51	no	3	2	no	no	131.31	2.82
mean value	51.39		2.81	2.16			136.39	2.17
variance	7.2		0.54	0.45			23.95	0.86
